# Supplementary material for: ECG-Based Detection of Early Myocardial Ischemia in a Computational Model: Impact of Additional Electrodes, Optimal Placement, and a New Feature for ST Deviation
Source: Hindawi journal article supplement (doi:10.1155/2015/530352), 2015-01-01
Supplement: f1 [file 530352.f1.zip]

## Supplement contents list

- S1.pdf  
**Figure S1** Ischemia detection rates based on K point elevation for different thresholds and ECG lead systems. The dashed line represents the largest K point elevation observed in physiological simulations without any ischemic tissue considering all electrodes.
- S2.pdf  
**Figure S2** Ischemia detection rates based on K point elevation for single 12-lead channels per AHA segment averaged over the aforementioned set of thresholds. The temporal position of the K point was determined using all 12 leads.
