# Supplementary material for: ECG-Based Detection of Early Myocardial Ischemia in a Computational Model: Impact of Additional Electrodes, Optimal Placement, and a New Feature for ST Deviation
Source: Biomed Res Int. 2015 Oct 26;2015:530352. doi: 10.1155/2015/530352 (PMC4637443; doi:10.1155/2015/530352)
Supplement: Supplementary file 1 — Figure S1. Ischemia detection rates based on K point elevation for different thresholds and ECG lead systems. The dashed line represents the largest K point elevation observed in physiological simulations without any ischemic tissue considering all electrodes. Figure S2. Ischemia detection rates based on K point elevation for single 12-lead channels per AHA segment averaged over the aforementioned set of thresholds. The temporal position of the K point was determined using all 12 leads. [file 530352.f1.zip]

Archive with 7 entries (6 files):
- Supplement contents list.pdf
- __MACOSX/
- __MACOSX/._Supplement contents list.pdf
- leadsElev.pdf
- __MACOSX/._leadsElev.pdf
- threshK_elev.pdf
- __MACOSX/._threshK_elev.pdf
