# Supplementary figures and images for: ECG-Based Detection of Early Myocardial Ischemia in a Computational Model: Impact of Additional Electrodes, Optimal Placement, and a New Feature for ST Deviation
Source: Hindawi journal article supplement (doi:10.1155/2015/530352), 2015-01-01

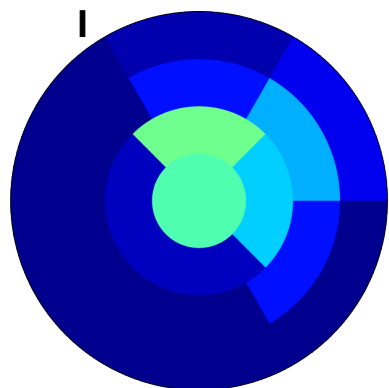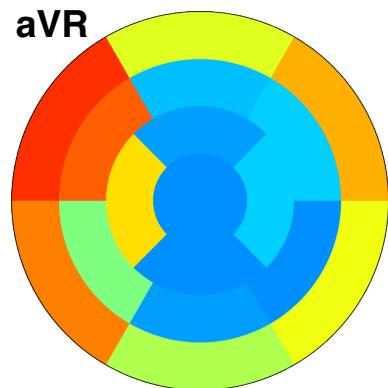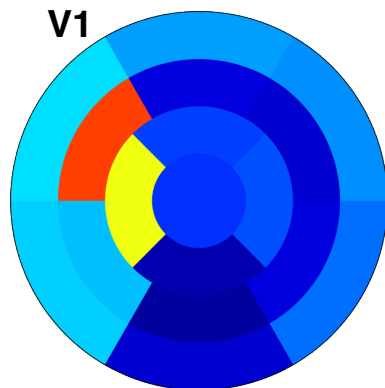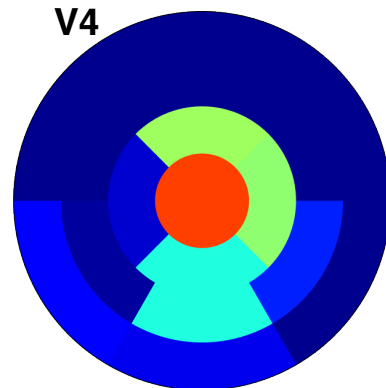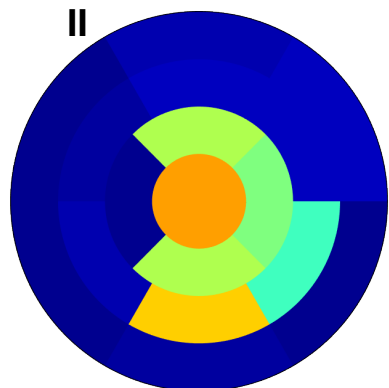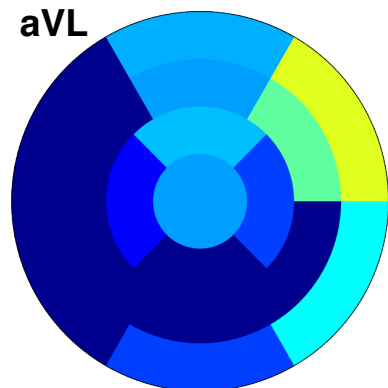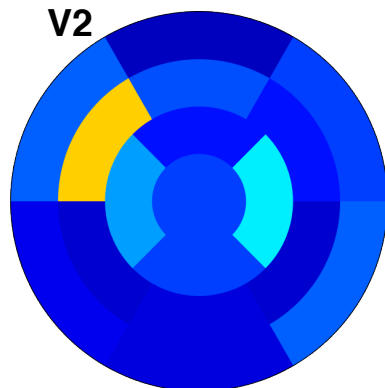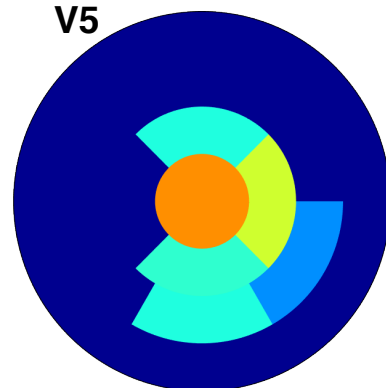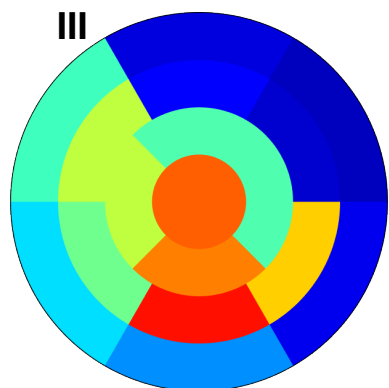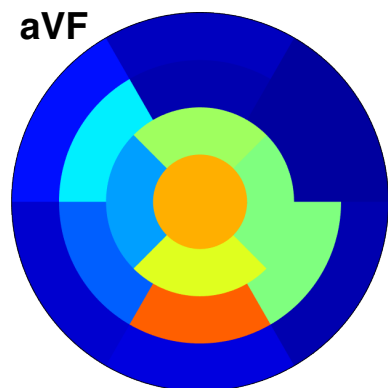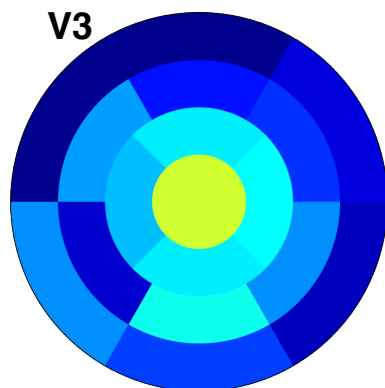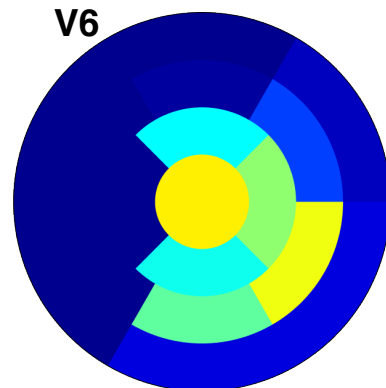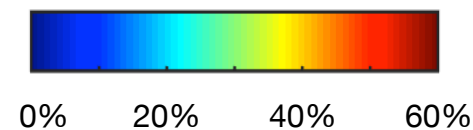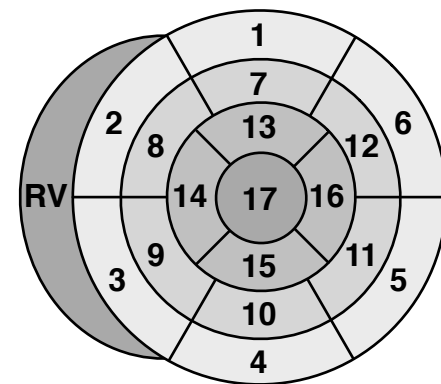

Supplement: f1 [file 530352.f1.zip]

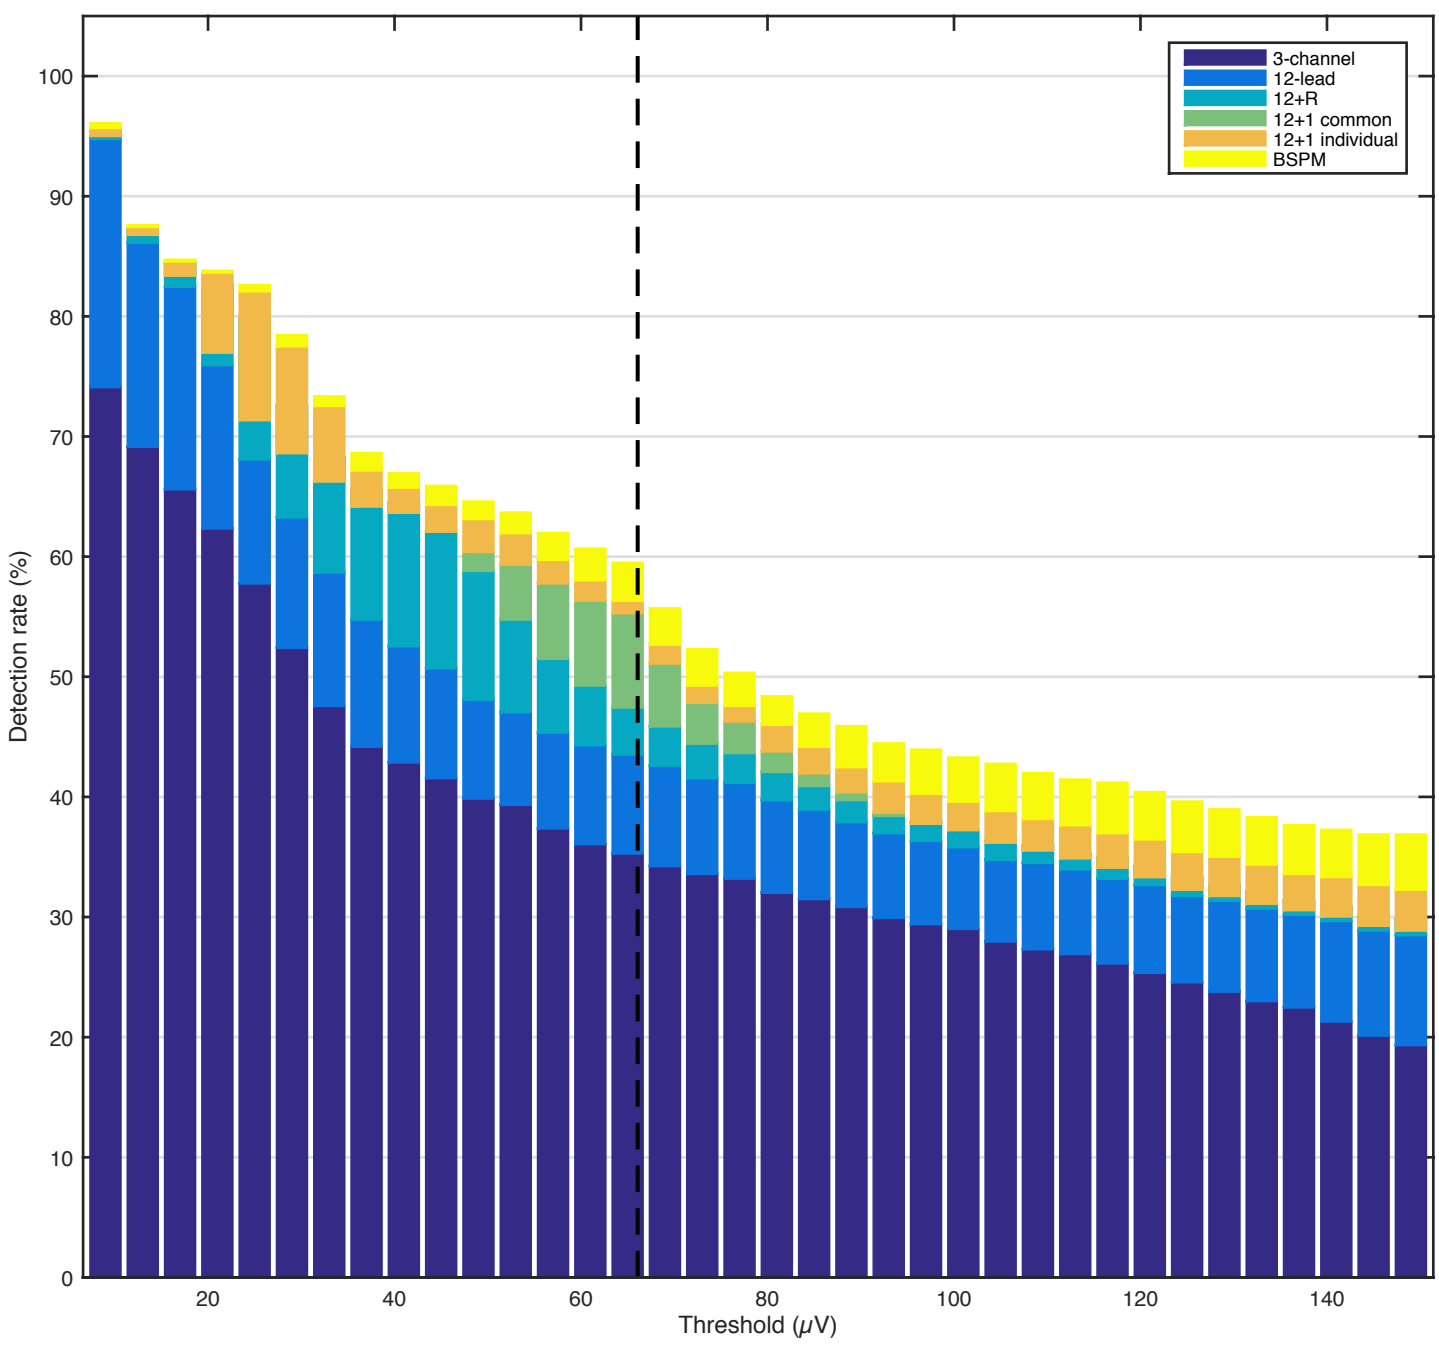

Supplement: f1 [file 530352.f1.zip]
